# Supplementary material for: Bioremoval of Co(II) by a novel halotolerant microalgae Dunaliella sp. FACHB-558 from saltwater
Source: Front Microbiol. 2024 Apr 30;15:1256814. doi: 10.3389/fmicb.2024.1256814 (PMC11092966; doi:10.3389/fmicb.2024.1256814)
Supplement: Supplementary file 1 [file Data_Sheet_1.xlsx]

## Sheet: NaCI FACHB-558
	Salinity
Day	0.5M			1.5M			2.5M			3.5M			4.5M
0	18167	18167	18167	18167	18167	18167	18167	18167	18167	18167	18167	18167	18167	18167	18167
2	70000	60000	50000	50000	40000	50000	30000	40000	30000	30000	40000	30000	20000	30000	20000
4	250000	210000	240000	140000	160000	140000	110000	120000	120000	60000	60000	70000	30000	40000	30000
6	360000	340000	355000	340000	350000	360000	200000	220000	210000	100000	90000	100000	50000	50000	50000
8	420000	450000	480000	540000	560000	590000	320000	350000	300000	150000	140000	140000	80000	80000	70000
10	600000	650000	550000	760000	720000	750000	380000	350000	520000	250000	230000	200000	120000	130000	140000
12	880000	850000	880000	1100000	1050000	1050000	550000	500000	520000	350000	320000	320000	180000	210000	200000
14	1480000	1420000	1380000	1540000	1510000	1460000	720000	730000	700000	480000	440000	500000	300000	300000	320000
16	1840000	1620000	1920000	1950000	1800000	1760000	1050000	1100000	1100000	620000	680000	660000	350000	320000	350000
18	1840000	1950000	1750000	1890000	1870000	1880000	1150000	1200000	1190000	750000	700000	690000	410000	320000	320000
20	1800000	1880000	1830000	1900000	1850000	1880000	1160000	1250000	1170000	700000	750000	750000	340000	350000	300000

## Sheet: Biomass FACHB-558
	Salinity
	0.5M			1.5M			2.5M			3.5M			4.5M
Biomass	0.986934	1.01709	0.970903	1.04831	0.988323	1.02187	0.622423	0.676989	0.626532	0.386927	0.444584	0.435771	0.196765	0.2339	0.20723

## Sheet: Nile Red
	Salinity
	0.5M			1.5M			2.5M			3.5M			4.5M
Fluoresence	1.005	0.826	1.174	3.242	4.242	5.042	6.525	7.242	7.452	8.752	9.398	9.785	10.785	9.787	10.744

## Sheet: CoCl2 CC-5325
Day	C. reinhardtii CC-5325
0	80000	80000	80000
15	10000	10000	10000
30	0	0	0
45	0	0	0
60	0	0	0
75	0	0	0

## Sheet: CoCl2 Dunaliella
Day	D. salina CCAP19/18			D. sp. FACHB-558
0	80000	80000	80000	80000	80000	80000
15	250000	200000	220000	500000	600000	700000
30	600000	650000	550000	1200000	1600000	1500000
45	1200000	1100000	1500000	3400000	3200000	3600000
60	1600000	1600000	1300000	7000000	7800000	7300000
75	1850000	1650000	1000000	6750000	7500000	7250000

## Sheet: Biomass CoCl2
	CCAP19/18			FACHB-558
Mock	1.19585	1.21452	1.27454	1.04831	0.988323	1.02187
CoCl2	0.94422	0.97893	0.91578	3.45214	3.37274	3.14258

## Sheet: Heavy Metals
	FACHB-558
Day	Mock			CoCl2			NiCl2			CdCl2
0	80000	80000	80000	80000	80000	80000	80000	80000	80000	80000	80000	80000
15	1750000	1700000	1720000	500000	600000	700000	600000	650000	550000	390000	340000	360000
30	1160000	1220000	1250000	1350000	1500000	1450000	1050000	1150000	1120000	770000	690000	710000
45	860000	835000	880000	3300000	3000000	3250000	2500000	2200000	2550000	1200000	1050000	1150000
60	760000	720000	750000	6000000	7200000	7000000	5000000	5200000	5400000	2100000	1900000	1800000
75	700000	710000	660000	6700000	6500000	6250000	4900000	4500000	4750000	1700000	1850000	1650000

## Sheet: Biomass HMs
	FACHB-558
Day	Mock			CoCl2			NiCl2			CdCl2
15	0.967318	1.00772	0.999367	0.294118	0.352941	0.411765	0.342857	0.371429	0.314286	0.226744	0.197674	0.209302
60	0.439306	0.416185	0.433526	3.28978	3.89525	3.71384	2.75871	2.77799	2.93516	1.1268	1.02902	0.963895

## Sheet: Relative protein CoCl2
	Mock			CoCl2
FACHB-558	1.03846	0.976923	0.992308	1.02308	1.04615	1.09231

## Sheet: Protein CoCl2
	Mock			CoCl2
FACHB-558	0.136	0.122	0.127	0.452	0.455	0.427

[truncated: 12 more sheets: Relative NO, Relative CAT, Relative POD, Relative Chlorophll, Relative NO ATG, Relative CAT ATG, Relative POD ATG, pH, biosorbent FACHB-558, biosorption rate FACHB-558, biosorbent ATG, biosorption rate ATG]
